1                   **Quality Control Framework of TCM Preparations based on**  
2                   **Multi-type Fingerprints using a Source Proportion Estimation Model**

3                   *Yuguo Zha<sup>1</sup>, Qi Yao<sup>1</sup>, Dan Zhao<sup>1</sup>, Xue Zhu<sup>1</sup>, Hong Bai<sup>1,\*</sup>, Kang Ning<sup>1,\*</sup>*

4                   <sup>1</sup> *School of Life Science and Technology, Huazhong University of Science and Technology, Wuhan,*

5                   *Hubei, 430074, China*

6                   \* Corresponding author. Tel: +86 27 87793041, e-mail: ningkang@hust.edu.cn (Kang Ning),

7                   baihong@hust.edu.cn (Hong Bai).

8

## 9 **Abstract**

10 Traditional Chinese Medicine (TCM) preparations have been widely used in clinical  
11 practice for the treatment of various diseases. The quality of TCM preparations is  
12 related to clinical efficacy and safety and is highly valued by researchers. The  
13 authenticity of TCM preparation can be guaranteed objectively by accurate quality  
14 control according to the composition. Here, we proposed a quality control framework  
15 of TCM preparations, which is based on multi-type fingerprints using the source  
16 proportion estimation model (SPEM). The high-performance liquid chromatography  
17 (HPLC) analysis and the high-throughput sequencing analysis are employed to  
18 acquire the chemical and taxonomic fingerprints of samples, respectively. The quality  
19 of TCM preparations among different manufacturers or batches is evaluated by using  
20 SPEM, which is an unsupervised method for source identification of TCM samples.  
21 Results showed the good performance of the quality control framework, for example,  
22 SPEM achieved a mean accuracy of 0.778 based on the ITS2 taxonomic fingerprint  
23 when differentiating manufacturer of BazhenYimu Wan pill. Applications of the  
24 quality control framework revealed the batch effect in TCM samples, and  
25 environmental factors, such as geography have a profound impact on the consistency  
26 of TCM preparations. In summary, this study is an exploration in the field of digital  
27 development of TCM preparations and provide a new insight to quantify the batch  
28 effect among different batches of TCM samples.

29 **Keywords:** Traditional Chinese Medicine; Quality control; Fingerprint; Source  
30 proportion estimation; Batch effect

## 31 **Introduction**

32 Traditional Chinese medicine (TCM) preparation has been widely used in clinical  
33 practice in China for tens of centuries<sup>1-4</sup>. However, the quality and safety of TCM  
34 preparations remain key concerns around the world, which hinder their broader  
35 application and popularity among international healthcare practitioners<sup>5</sup>. In recent  
36 years, due to the proven therapeutic effects of several authentic and precious TCM  
37 preparations, the adulteration, substitution and mislabeling of TCM become a global  
38 concern<sup>6</sup>. There are many reports on the traceability of Chinese medicinal materials  
39 based on DNA barcoding technology<sup>7,8</sup>. It is necessary to ensure the authenticity and  
40 reliability of TCM production by means of traceability. Quality control of TCM  
41 preparations, identifying from which manufacturer or batch the TCM (including the  
42 forms of pills, powders, capsules, tablets, etc.) is from, would be critical in TCM  
43 industry, for both producers and consumers alike. However, the quality control of  
44 TCM herbs is much more difficult than quality control of small molecules in western  
45 medicines. High quality TCM herbal preparations only comes from herbs with good  
46 quality, while the authenticity of TCM herbs is the first point of concern for quality.

47

48 TCM preparations are usually composed of several natural materials including plant,  
49 animal and mineral, based on which the therapeutic effects of TCM preparations are  
50 exerted. Therefore, the quality of TCM preparations is very important for clinical  
51 efficacy. For a long time, people relied on experience, from the appearance, smell and  
52 some simple physical and chemical phenomena of medicinal materials to judge their

53 authenticity, but it is often very subjective and one-sided. With the development of  
54 modern molecular biology technology, the quality control methods of TCM have  
55 changed a lot. Quality control of TCM preparations recorded in Chinese  
56 Pharmacopoeia (Ch. P. ) is mainly composed of the chemical ingredient (main  
57 chemical components) analysis and biological ingredient (taxonomy composition)  
58 analysis<sup>9</sup>. To date, studies focused on chemical ingredients of TCM preparations were  
59 abundant, while a few studies were reported for their biological ingredients. As an  
60 important part of TCM research, biological ingredients have drawn more and more  
61 attention around the world. Biological composition and chemical composition are  
62 inseparable parts for the quality control of TCM compound preparations. However,  
63 there is currently a lack of effective quality control framework of TCM preparations  
64 based on multi-type fingerprints<sup>10</sup>.

65

66 Here, we proposed a quality control framework of TCM preparations based on  
67 multi-type fingerprints using the source proportion estimation model (SPEM). The  
68 quality control framework is used to evaluate the quality of TCM preparations more  
69 accurately, comprehensively and systematically. The multi-type fingerprints include  
70 chemical fingerprint acquired by HPLC and taxonomic fingerprint acquired by  
71 high-throughput sequencing. HPLC is widely applied to characterize the chemical  
72 components in TCMs and is regarded as one of the most promising and reliable means  
73 for quality control of TCM preparations, and high-throughput sequencing is widely  
74 used to identify the taxonomy composition in biological samples. Multi-type

75 fingerprints could be used to identify the sources and reflect changes in the intrinsic  
76 quality of TCMs. SPEM employs the source tracking method, FEAST<sup>11</sup> to measure  
77 the similarities between TCMs samples. The combination of multi-type fingerprints  
78 with the source proportion estimation method can effectively discriminate TCMs from  
79 different geographical sources, parts, and cultivars and identify authenticity to prevent  
80 adulteration.

81

82 We used four types of TCM preparations as prototypes and performed experiments  
83 based on TCM samples from two manufacturers and three batches. Results showed  
84 the good performance of the quality control framework. For example, SPEM achieved  
85 a mean accuracy of 0.778 based on the ITS2 taxonomic fingerprint when identify  
86 which manufacturer the BazhenYimu Wan (BYW) pill sample is from. Applications  
87 of the quality control framework revealed the batch effect in TCM samples, and  
88 environmental factors, such as geography have a profound impact on the consistency  
89 of TCM preparations. In summary, this study is an exploration in the field of digital  
90 development of TCM preparations and provide a new insight to quantify the batch  
91 effect among different batches of TCM samples.

92

## 93 **Materials and Methods**

### 94 **Sample preparations**

95 *Samples and Reagents:* 4 type of TCM preparations were purchased from 2 different  
96 Chinese manufacturers (namely A and B), and each with 3 batch numbers (I, II and III)

97 (Table 1). Each batch was implemented with 3 parallel repeats, therefore there were  
 98  $2*3*3 = 18$  samples for each type of TCM preparation, and there were  $4*18 = 72$   
 99 samples in total.

100

101 **Table 1. General information of samples used in this study.**

| TCM preparation               | Manufacturer | Batch name | Batch ID |
|-------------------------------|--------------|------------|----------|
| BazhenYimu Wan<br>(BYW)       | BYW-A        | BYW-A-I    | 1401001  |
|                               |              | BYW-A-II   | 1405006  |
|                               |              | BYW-A-III  | 1505004  |
|                               | BYW-B        | BYW-B-I    | 3035342  |
|                               |              | BYW-B-II   | 3035344  |
|                               |              | BYW-B-III  | 4035390  |
| DaHuoLuo Wan<br>(DHW)         | DHW-A        | DHW-A-I    | 3013381  |
|                               |              | DHW-A-II   | 15013714 |
|                               |              | DHW-A-III  | 16013091 |
|                               | DHW-B        | DHW-B-I    | 140180   |
|                               |              | DHW-B-II   | 150050   |
|                               |              | DHW-B-III  | 150080   |
| Niu HuangJiangya<br>Wan (NJW) | NJW-A        | NJW-A-I    | 5450262  |
|                               |              | NJW-A-II   | 5450280  |
|                               |              | NJW-A-III  | 5450287  |
|                               | NJW-B        | NJW-B-I    | 12011634 |
|                               |              | NJW-B-II   | 15010451 |
|                               |              | NJW-B-III  | 15012441 |
| Yougui Wan<br>(YGW)           | YGW-A        | YGW-A-I    | 15013825 |
|                               |              | YGW-A-II   | 16013019 |
|                               |              | YGW-A-III  | 16013369 |
|                               | YGW-B        | YGW-B-I    | 121105   |
|                               |              | YGW-B-II   | 140217   |
|                               |              | YGW-B-III  | 140306   |

102

103 These 4 types of TCM preparations include: BazhenYimu Wan (BYW), DaHuoLuo  
 104 Wan (DHW), Niu HuangJiangya Wan (NJW) and Yougui Wan (YGW). In the  
 105 recording of Chinese pharmacopoeia, their prescribed biological ingredients specified

106 in Chinese pharmacopoeia were listed in (**Table S1** and **Table S2** in **Supplementary**  
107 **Materials**).

108

109 *Sample preparation and analyses for biological ingredient*: The steps of DNA  
110 extraction, amplification, sequencing and data analysis were described in our previous  
111 work<sup>12,13</sup>. Briefly, DNA was extracted by TCM-CTAB method, and these DNA  
112 extracts were amplified by touchdown PCR (by using ribosomal internal transcribed  
113 spacer 2, ITS2 and *trnL* as biomarker) before sent for Illumina MiSeq PE300  
114 paired-end sequencing. After removing one *trnL*-marked BYW specimen that failed to  
115 be amplified and one ITS2-marked YGW sample that failed to be built the  
116 next-generation sequencing library preparation, the sequencing data of 142 samples  
117 was obtained and deposited and could be obtained from NCBI SRA database with  
118 accession number PRJNA562480.

119

120 Based on sequencing data, quality control, species identification and reads mapping of  
121 each species have been performed by following step: Reads from the same sample  
122 were assembled together by using ‘join\_paired\_end.py’ script in QIIME environment.  
123 Then the double-end barcodes (**Table S3** in **Supplementary Materials**) was extracted  
124 from all reads, and the ‘split\_libraries\_fastq.py’ was used to split the sample  
125 according their barcodes from the mixed sequencing data, and the Cutadapt command  
126 to remove the primers (**Table S4** in **Supplementary Materials**) from all samples. For  
127 every sample, the reads were then filtered by MOTHUR. We discarded <150 bp  
128 or >510 bp ITS2 reads, and <75 bp *trnL* reads. We also filtered the sequence whose  
129 average quality score was below 20 in each five bp-window rolling along with the

130 whole reads. Then the sequences that contained ambiguous base call (N),  
131 homopolymers of more than eight bases or primers mismatched, uncorrectable  
132 barcodes, were also removed from all datasets. To match the most matched species for  
133 each sequence, we used the BLASTN (E-value=1E-10) to search in ITS2 and *trnL*  
134 database based on GenBank, respectively. Among all results, we first chose the  
135 prescribed herbal species with the highest score, else we selected the top-scored  
136 species. Then, we discarded the corresponding species of ITS2 and *trnL* sequences  
137 with relative abundance below 0.002 and 0.001, respectively.

138

### 139 **Chemical fingerprint processing**

140 The chemical fingerprint of four kinds of TCM was established by high performance  
141 liquid chromatography (HPLC) method. The chemical fingerprint can reflect the  
142 characteristics of the TCM preparation to some extent, and can qualitatively compare  
143 the differences of chemical components in the TCM preparation, and then carry on the  
144 quality control of samples from different manufacturers and batches. Within a certain  
145 range, the content of a compound and its peak area are linear, which means that  
146 complex TCM preparations can be quantitatively identified by comparing the  
147 fingerprint feature. This also serves as the theoretical basis for the use of fingerprints  
148 in TCM preparations quality control<sup>14,15</sup>. Details about chemical fingerprints for these  
149 TCM preparations were provided in **Table S5 in Supplementary Materials**.

150

### 151 **Taxonomic fingerprint processing**

152 The identities and normalized relative abundances of species identified from TCM



153 preparation samples represent the basic elements of the taxonomic fingerprint of  
154 samples. There are two types of taxonomic fingerprint (ITS2 and *trnL*) for each  
155 sample. For example, there were 41 ITS2 features and 72 *trnL* features for all of the  
156 18 BYW samples. Details about taxonomic fingerprints for other preparations were  
157 provided in **Table S6** in **Supplementary Materials**.

158

### 159 **Source proportion estimation model and evaluation procedure**

160 Source proportion estimation model (SPEM) employs the source tracking method (*i.e.*,  
161 FEAST) to measure the similarities between TCMs samples. FEAST<sup>11</sup> is an  
162 unsupervised method based on the Expected Maximization (EM) algorithm, which is  
163 successfully used in source tracking of microbial community samples. The great  
164 feature of FEAST is that it can tell in a sample with mixed species which proportions  
165 come from which different sub-environments. Here, we first consider two  
166 manufacturers as different sub-environments, and evaluate the source proportion of  
167 samples for each preparation and batch. Then, we consider three batches as different  
168 sub-environments, and evaluate the source proportion of samples for each preparation  
169 and manufacturer. To evaluate the ability of SPEM on identifying TCM samples from  
170 different manufacturers or batches, we used accuracy to represent such ability. For  
171 each TCM preparation (e.g., BYW) and each fingerprint (e.g., ITS2), TCM samples  
172 from the same batch (e.g., Batch-I) were selected for source identification via  
173 leave-one-out experiments. Specifically, there are 6 samples from the batch I of TCM  
174 preparation BYW, we used one sample (assume from manufacturer A) as unknown

175 sink (i.e., query sample), and the remains (5 samples, 2 from manufacturer A and 3  
176 from manufacturer B) as source samples. Then, SPEM was conduct to tell in the  
177 query sample of unknown sink which proportions come from which different sources  
178 (manufacturers). If the proportion of manufacturer A is the biggest proportion, then it  
179 is a correct case. For all the six samples, we performed six experiments, and count the  
180 accuracy as the number of correct cases over the number of total cases.

181

### 182 **SPD measurement**

183 We defined the SPD score as source proportion divergence which is used for  
184 quantifying the batch effect among samples of TCM preparation. The SPD score is  
185 between 0 (no batch effect) and 1 (maximum batch effect). Specifically, for one  
186 preparation  $p$  and one manufacturer  $m$ ,  $SPD_{p,m}$  score could be computed with the  
187 following formula:

$$188 \quad SPD_{p,m} = \frac{M}{N(M-1)} \sum_{i=1}^N |SP_{i,j} - \frac{1}{M}| \quad (1)$$

189 where  $N$  is the number of samples belong to preparation  $p$  and manufacturer  $m$ ,  $M$   
190 is the number of sub-environments (batches) involved,  $SP_{i,j}$  represent the source  
191 proportion of sample  $i$  from sub-environment  $j$ . For example, for preparation BYW  
192 and manufacturer A, there are 9 samples and 3 sub-environments (batches I, II and  
193 III).

194

195 For one preparation  $p$  and one batch  $b$ ,  $SPD_{p,b}$  score could be computed with the  
196 following formula:

197 
$$SPD_{p,b} = \frac{M}{N(M-1)} \sum_{i=1}^N |SP_{i,j} - \frac{1}{M}| \quad (2)$$

198 where  $N$  is the number of samples belong to preparation  $p$  and batch  $b$ ,  $M$  is the  
199 number of sub-environments (manufacturers) involved,  $SP_{i,j}$  represent the source  
200 proportion of sample  $i$  from sub-environment  $j$ . For example, for preparation BYW  
201 and batch I, there are 6 samples and 2 sub-environments (manufacturer A and B).

202

## 203 **Results**

### 204 **Quality control framework of TCM preparations**

205 The newly proposed quality control framework of TCM preparations could be  
206 described as following workflow (**Figure 1**). First, chemical fingerprint and  
207 taxonomic fingerprint are obtained by high performance liquid chromatography  
208 (HPLC) analysis and high-throughput sequencing analysis, respectively. Second,  
209 SPEM employs the source tracking method, FEAST<sup>11</sup>, to measure the similarities  
210 between TCMs samples. Third, source proportion divergence (SPD, see **Materials**  
211 **and Methods**) is used to measure the batch effect in TCM samples.

212

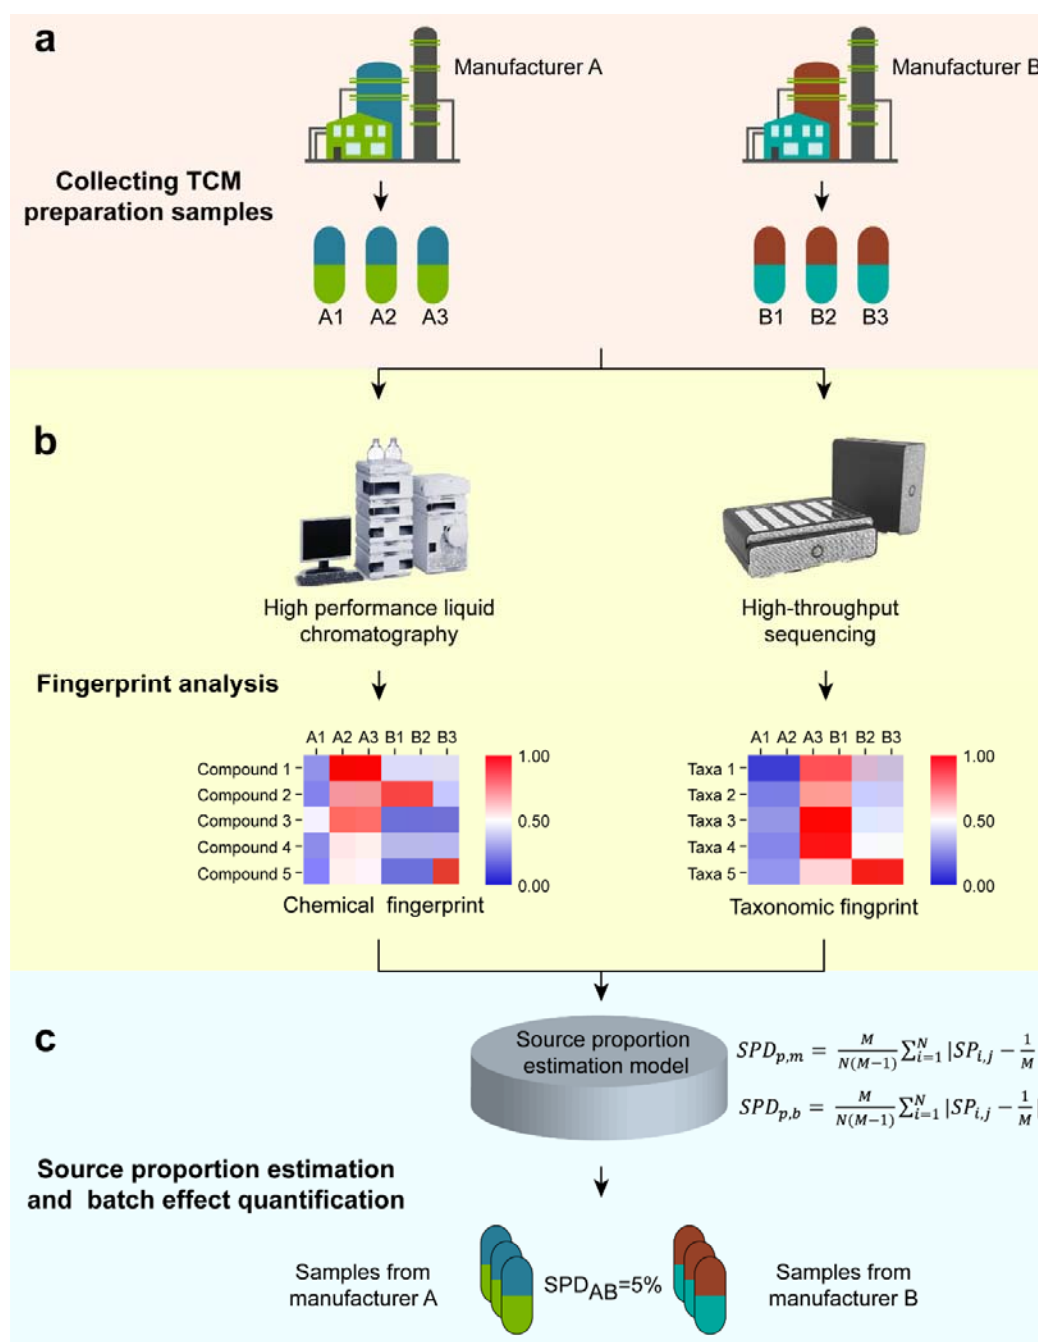

213

214 **Figure 1. The newly proposed quality control framework of TCM preparations. a,**

215 **b.** TCM samples are collected and processed to produce the chemical and taxonomic

216 fingerprints. **c.** Utilizing SPEM to measure the similarities between TCMs samples

217 and measuring the batch effect in TCM samples with SPD. SPD, source proportion

218 divergence.

219

220 **Similarity profiling of samples for different TCM preparations**

221 Here, we took three batches of samples from two manufacturers with four types of  
222 TCM preparations as prototypes for testing (see **Materials and Methods**). The  
223 distance-based approach (i.e., Bray-Curtis) was first applied on all samples to provide  
224 an overview of the similarities among samples. We performed similarity profiling on  
225 the samples of four types of TCM preparations. Results of similarity profiling of  
226 samples for each preparation are showed in **Figure 2**.

227

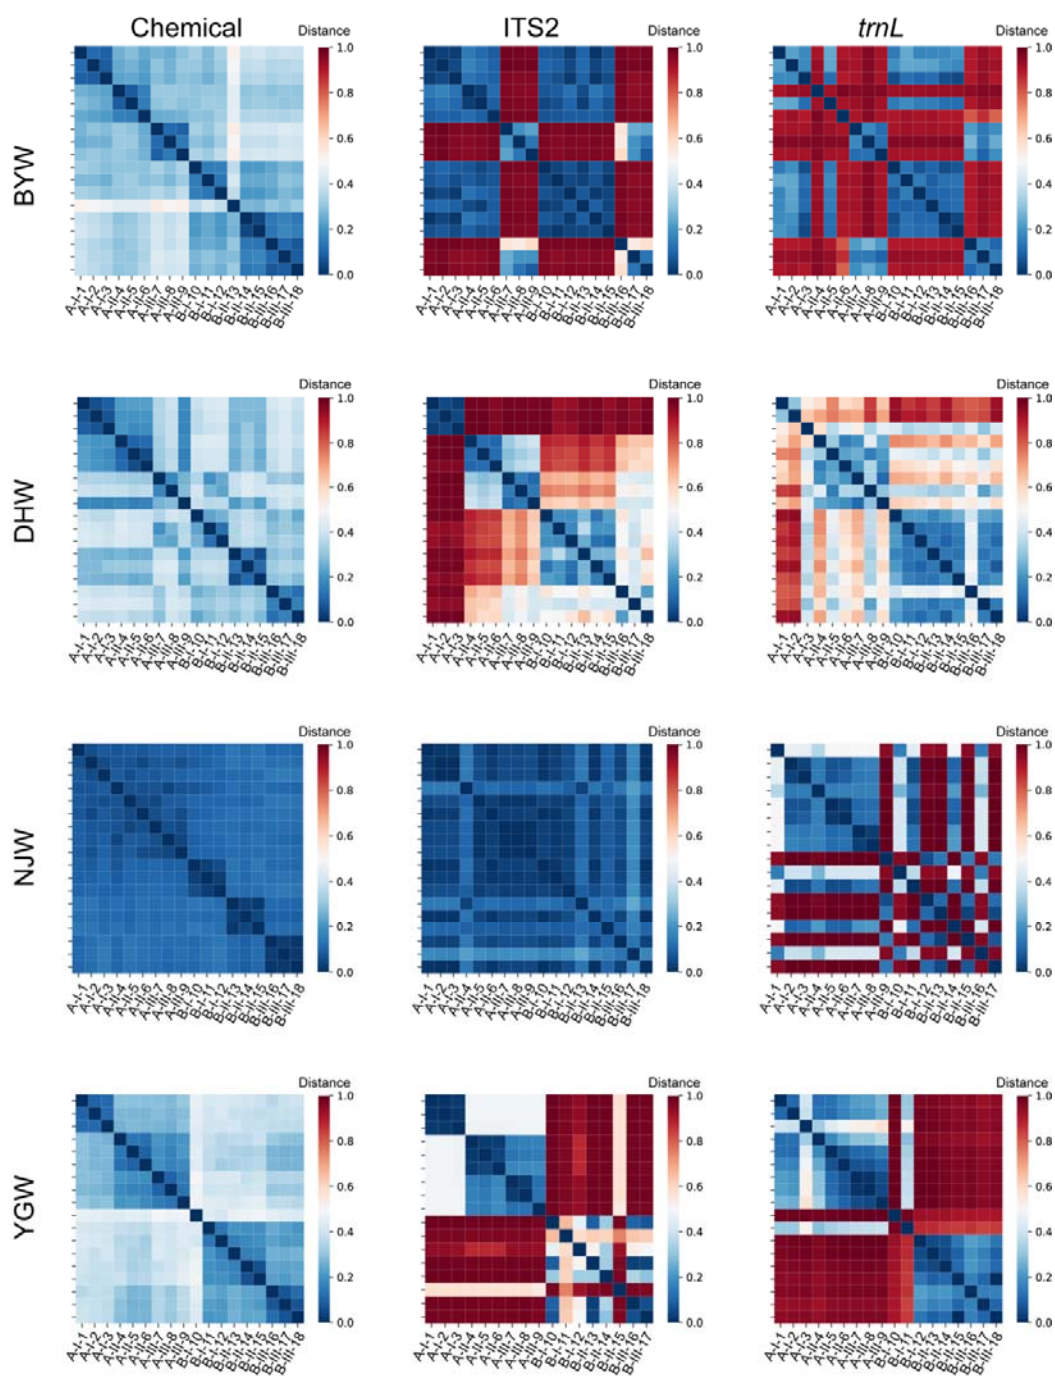

228

229 **Figure 2. Similarity profiling of samples for each preparation based on chemical and**

230 **taxonomic fingerprints.** Color key indicates Bray-Curtis distance between TCM samples, which

231 ranges from 0 to 1.

232

233 The Bray-Curtis distance among samples from different manufacturers but the same

234 batch is relatively large, while Bray-Curtis distance among samples from different  
235 batches but the same manufacturer is relatively small. For example, the Bray-Curtis  
236 distance based on ITS2 taxonomic fingerprint among samples of YGW from two  
237 different manufacturers is relatively large (red color in batches I, II, and III), but the  
238 Bray-Curtis distance based on ITS2 taxonomic fingerprint among samples of YGW  
239 from three different batches is relatively small (blue color in manufacturers A and B).  
240 Here, we noticed that chemical fingerprint is more stable in measuring Bray-Curtis  
241 distances among samples than taxonomic fingerprint (both ITS2 and *trnL*). A possible  
242 explanation for such observation is that the stable content of chemical mineral  
243 components contained in qualified TCM preparations, regardless of the manufacturer  
244 and batch. However, it does not mean that the biological components in TCM  
245 preparations are as stable as the mineral components. Thus, it is necessary to assess  
246 the quality of TCM preparations based on both chemical and taxonomic fingerprints.

247

#### 248 **Quality control of TCM preparations**

249 Quality control of TCM preparations, identifying which manufacturer or batch the  
250 TCM sample (including the forms of pills, powders, capsules, tablets, etc.) is from  
251 would be critical in TCM industry. Here, SPEM was applied on identifying TCM  
252 samples from various manufacturers and batches. We conducted sample source search  
253 for four types of TCM preparations based on the chemical and taxonomic fingerprints,  
254 and evaluated the accuracy of the search.

255

256 Firstly, we evaluated the accuracy of identifying TCM samples from various  
257 manufacturers. In general, compared to accuracy based on taxonomic fingerprint,  
258 accuracy based on chemical fingerprint is higher regardless of TCM preparations and  
259 batches. For example, the accuracy based on chemical fingerprint for BYW is 1, but  
260 only 0.778 for ITS2 and 0.556 for *trnL*, respectively (**Table 2**). In terms of taxonomic  
261 fingerprint, the overall accuracy based on ITS2 is a little higher than the overall  
262 accuracy based on *trnL*, e.g., 0.778 vs. 0.556 for BYW and 0.722 vs.0.522 for NJW  
263 (**Table 2**).

264

265 **Table 2. Accuracies of identifying TCM samples from various manufacturers**  
266 **using FEAST.**

| TCM | Fingerprint | Batch-I | Batch-II | Batch-III | Mean±Std    |
|-----|-------------|---------|----------|-----------|-------------|
| BYW | ITS2        | 0.833   | 1.000    | 0.500     | 0.778±0.255 |
|     | <i>trnL</i> | 0.333   | 0.500    | 0.833     | 0.556±0.255 |
|     | Chemical    | 1.000   | 1.000    | 1.000     | 1.000±0.000 |
| DHW | ITS2        | 1.000   | 1.000    | 1.000     | 1.000±0.000 |
|     | <i>trnL</i> | 0.833   | 1.000    | 1.000     | 0.944±0.096 |
|     | Chemical    | 1.000   | 1.000    | 1.000     | 1.000±0.000 |
| NJW | ITS2        | 1.000   | 0.167    | 1.000     | 0.722±0.481 |
|     | <i>trnL</i> | 0.333   | 0.833    | 0.400     | 0.522±0.271 |
| YGW | Chemical    | 1.000   | 1.000    | 1.000     | 1.000±0.000 |
|     | ITS2        | 1.000   | 0.833    | 1.000     | 0.944±0.096 |



|             |       |       |       |             |
|-------------|-------|-------|-------|-------------|
| <i>trnL</i> | 0.833 | 1.000 | 1.000 | 0.944±0.096 |
| Chemical    | 1.000 | 1.000 | 1.000 | 1.000±0.000 |

267 *Note:* Values in the table indicate accuracy.

268

269 Secondly, we evaluated the accuracy of identifying TCM samples from various  
 270 batches. In general, compared to accuracy based on taxonomic fingerprint, accuracy  
 271 based on chemical fingerprint is higher regardless of TCM preparations and  
 272 manufacturers. For example, the search accuracies based on chemical fingerprint for  
 273 BYW is 0.944, but only 0.722 for both ITS2 and *trnL*, (**Table 3**). In terms of  
 274 taxonomic fingerprint, accuracy based on ITS2 is a little higher than accuracy based  
 275 on *trnL*, e.g., 0.778 vs. 0.444 for DHW and 0.667 vs. 0.157 for NJW (**Table 3**).

276

277 **Table 3. Accuracies of identifying TCM samples from various batches using**  
 278 **FEAST.**

| TCM | Fingerprint | Manufacturer<br>-A | Manufacturer<br>-B | Mean±Std    |
|-----|-------------|--------------------|--------------------|-------------|
|     | ITS2        | 0.889              | 0.556              | 0.722±0.236 |
| BYW | <i>trnL</i> | 0.778              | 0.667              | 0.722±0.079 |
|     | Chemical    | 1.000              | 0.889              | 0.944±0.079 |
|     | ITS2        | 1.000              | 0.556              | 0.778±0.314 |
| DHW | <i>trnL</i> | 0.667              | 0.222              | 0.444±0.314 |
|     | Chemical    | 0.889              | 0.889              | 0.889±0.000 |
|     | ITS2        | 0.778              | 0.556              | 0.667±0.157 |
| NJW | <i>trnL</i> | 0.556              | 0.000              | 0.278±0.393 |
|     | Chemical    | 0.667              | 1.000              | 0.833±0.236 |
| YGW | ITS2        | 0.889              | 0.125              | 0.507±0.540 |

|             |       |       |             |
|-------------|-------|-------|-------------|
| <i>trnL</i> | 0.556 | 0.111 | 0.333±0.314 |
| Chemical    | 1.000 | 0.889 | 0.944±0.079 |

---

279 *Note:* Values in the table indicate accuracy.

280

### 281 **Batch effect evaluation based on source proportion divergence**

282 We noticed that there are different degrees of batch effect in TCM samples for each  
283 TCM preparation, and batched effect existed in samples from two different  
284 manufacturers or samples from three different batches. We used source proportion  
285 divergence (SPD, see **Materials and Methods**) to quantify the batch effect that  
286 existed in samples from different manufacturers (**Table 4**) and batch effect that  
287 existed in samples from different batches (**Table 5**). The value of SPD is between 0  
288 and 1, and the closer SPD is to 0, the smaller the batch effect is. On the contrary, the  
289 closer SPD is to 1, the larger the batch effect is.

290

291 First, we investigated the batch effect among TCM samples from different  
292 manufacturers. Results showed an overall SPD values between 0.260 and 0.286 based  
293 on chemical fingerprint for those TCM preparations (**Table 4**). However, the  
294 ITS2-based SPD values ranged from 0.192 to 0.275, and the *trnL*-based SPD values  
295 ranged from 0.193 to 0.293 (**Table 4**). Results suggested that there are different  
296 degrees of batch effect in samples for each type of TCM preparation. Moreover,  
297 results showed that the batch effect existing in two manufacturers based on chemical  
298 fingerprint was larger than the batch effect based on taxonomic fingerprint. For  
299 example, the SPD value based on chemical fingerprint of BYW is 0.285, which is

300 significantly larger than the SPD value based on ITS2 or *trnL* fingerprint (i.e., 0.192  
 301 for ITS2, 0.193 for *trnL*).

302

303 **Table 4. Source proportion divergence of TCM samples from different**  
 304 **manufacturers.**

| TCM | Fingerprint | Batch-I | Batch-II | Batch-III | Mean±Std    |
|-----|-------------|---------|----------|-----------|-------------|
| BYW | ITS2        | 0.164   | 0.220    | 0.190     | 0.192±0.028 |
|     | <i>trnL</i> | 0.189   | 0.191    | 0.200     | 0.193±0.006 |
|     | Chemical    | 0.283   | 0.281    | 0.291     | 0.285±0.005 |
| DHW | ITS2        | 0.315   | 0.287    | 0.224     | 0.275±0.047 |
|     | <i>trnL</i> | 0.236   | 0.258    | 0.162     | 0.219±0.050 |
|     | Chemical    | 0.271   | 0.290    | 0.219     | 0.260±0.037 |
| NJW | ITS2        | 0.222   | 0.199    | 0.287     | 0.236±0.045 |
|     | <i>trnL</i> | 0.192   | 0.303    | 0.288     | 0.261±0.060 |
|     | Chemical    | 0.285   | 0.272    | 0.301     | 0.286±0.015 |
| YGW | ITS2        | 0.191   | 0.240    | 0.251     | 0.228±0.032 |
|     | <i>trnL</i> | 0.249   | 0.309    | 0.321     | 0.293±0.039 |
|     | Chemical    | 0.232   | 0.283    | 0.284     | 0.267±0.030 |

305 *Note:* Values in the table indicate source proportion divergence.

306

307 Second, we investigated the batch effect among samples from different batches.

308 Results showed the SPD values of manufacturer-B is always smaller than the SPD

309 values of manufacturer-A (**Table 5**) and the batch effect existing in three batches  
 310 based on chemical fingerprint was larger than the batch effect based on taxonomic  
 311 fingerprint. For example, the SPD value based on chemical fingerprint of BYW is  
 312 0.373, which is significantly larger than the SPD value based on ITS2 or *trnL*  
 313 fingerprint (i.e., 0.292 for ITS2, 0.354 for *trnL*).

314

315 **Table 5. Source proportion divergence of samples from different batches.**

| TCM | Fingerprint | Manufacturer<br>-A | Manufacturer<br>-B | Mean±Std    |
|-----|-------------|--------------------|--------------------|-------------|
| BYW | ITS2        | 0.387              | 0.196              | 0.292±0.136 |
|     | <i>trnL</i> | 0.354              | 0.354              | 0.354±0.000 |
|     | Chemical    | 0.428              | 0.319              | 0.373±0.077 |
| DHW | ITS2        | 0.411              | 0.143              | 0.277±0.190 |
|     | <i>trnL</i> | 0.264              | 0.110              | 0.187±0.109 |
|     | Chemical    | 0.374              | 0.374              | 0.374±0.000 |
| NJW | ITS2        | 0.330              | 0.220              | 0.275±0.078 |
|     | <i>trnL</i> | 0.186              | 0.172              | 0.179±0.010 |
|     | Chemical    | 0.112              | 0.451              | 0.281±0.240 |
| YGW | ITS2        | 0.375              | 0.139              | 0.257±0.167 |
|     | <i>trnL</i> | 0.266              | 0.132              | 0.199±0.095 |
|     | Chemical    | 0.368              | 0.298              | 0.333±0.049 |

316 *Note:* Values in the table indicate source proportion divergence.

317

318 In summary, there is a certain degree of batch effect existing in TCM samples from  
 319 the two manufacturers and the three batches, underscoring the challenges of quality  
 320 control of chemical and biological components in TCM preparation samples. SPEM

321 revealed the relative stability of biological components in TCM preparation samples  
322 compared to chemical components. Notably, the batch effect among TCM preparation  
323 samples from two manufacturers suggested that the same TCM formula from different  
324 manufacturers might need further optimization<sup>16</sup>. While on the other hand, we can not  
325 exclude the possibility that different manufacturers have optimized TCM preparations  
326 for certain TCM formula so that they could be more suitable for medical treatment the  
327 local population<sup>17,18</sup>.

328

## 329 **Discussions**

330 The quality of TCM preparations is related to clinical efficacy and safety, which is  
331 highly valued by people. TCM preparations consists of several herbs, which may  
332 contain hundreds or thousands of ingredients, which undoubtedly brings great  
333 difficulties to the quality control. Influenced by factors such as place of origin, growth  
334 time, harvest time, planting and processing technology, the quality of TCM  
335 preparations varies highly, leading to poor consistency of quality in different  
336 manufacturers and batches of preparations. Quality consistency has become a  
337 difficulty in the development of TCM industry, which profoundly affects the stable  
338 and controllable clinical efficacy of TCM and the repeatability and recognition of  
339 modern research results. However, rigorous quality control and assessment of  
340 components of TCM preparation are infrequently reported for TCM studies.

341

342 In this study, we proposed and evaluated a framework for an in-depth approach to a

343 comprehensive quality control assessment of TCM preparation. The framework  
344 consists of three stages: (1) apply high-throughput sequencing analysis to obtain  
345 taxonomic fingerprint of TCM preparation samples, and apply HPLC analysis to  
346 obtain chemical fingerprint of TCM preparation samples; (2) utilizing SPEM to  
347 measure the similarities between TCMs samples; (3) measuring the batch effect in  
348 TCM samples with SPD. In this study, we took three batches of samples from two  
349 manufacturers with four types of TCM preparations as prototypes for testing and  
350 evaluation. Additionally, we also used this framework to quantitatively analyze the  
351 batch effect of TCM preparation samples. Results showed the good performance of  
352 the quality control framework and revealed the batch effect among TCM samples.  
353 Most importantly, the quality of TCM samples is stable on the premise of meeting the  
354 single dosage of each component, no matter the chemical or biological component.

355

356 In summary, the SPEM model and SPD measurement in combination are powerful for  
357 quality control of TCM preparations based on multi-type fingerprints. The integration  
358 of chemical fingerprint and taxonomic fingerprint revealed the chemical and  
359 biological characteristics of different TCM preparations, and SPEM was proved to be  
360 successful for quantifying these differences. While SPD could further quantify the  
361 batch effects of samples from different manufacturers and batches. Applications of the  
362 quality control framework on four types of TCM preparations showed the ability of  
363 the framework on both source identification and batch effect quantification in TCM  
364 samples. This would not only be of values for large-scale TCM preparation screening,

365 but also could be used in clinics for quick and reliable source tracking.

366

## 367 **Conclusion**

368 Taken together, our study utilized multi-type fingerprints and SPEM model, which  
369 could help for explaining the relationship between these ingredient variations and the  
370 authenticity of TCM preparations. This study is an explorative study in the field of  
371 digital development of TCM preparations, illustrates the quantification platform for  
372 TCM preparation quality control, offers a new insight to quantify the batch effect  
373 among different batches of TCM samples, and provides future perspectives of using  
374 both chemical and taxonomic fingerprints combined with unsupervised/supervised  
375 methods towards accurate and fast quality control of TCM preparations.

376

## 377 **Declarations**

### 378 **Ethics approval and consent to participate**

379 Not applicable

380

### 381 **Consent for publication**

382 Not applicable

383

### 384 **Availability of data and materials**

385 The datasets generated and/or analyzed during the current study are available in the

386 NCBI Sequence Read Archive (SRA) repository with accession number

387 PRJNA562480.

388

389 **Competing interests**

390 The authors declare that they have no competing interests.

391

392 **Funding**

393 This work was partially supported by National Science Foundation of China grant

394 31871334 and 31671374, and the Ministry of Science and Technology (High-Tech)

395 grant (No. 2018YFC0910502).

396

397 **Authors' contributions**

398 H.B. and K.N. conceived of and proposed the idea, and designed the study. Y.Z., Q.Y.

399 and X.Z. performed the experiments. H.B., Y.Z., D.Z., X.Z. and K.N. analyzed the data.

400 H.B., Y.Z., D.Z., X.Z. and K.N. contributed to editing and proof-reading the

401 manuscript. All authors read and approved the final manuscript.

402

403 **Acknowledgments**

404 We thank GenWiz Inc. for conducting the high-throughput sequencing of the samples.

405



406 **References**

- 407 1 Liu, S.-H., Chuang, W.-C., Lam, W., Jiang, Z. & Cheng, Y.-C. Safety  
408 surveillance of traditional Chinese medicine: current and future. *Drug Saf* **38**,  
409 117-128 (2015).
- 410 2 Zhu, J., Shen, L., Lin, X., Hong, Y. & Feng, Y. Clinical Research on  
411 Traditional Chinese Medicine compounds and their preparations for  
412 Amyotrophic Lateral Sclerosis. *Biomedicine & Pharmacotherapy* **96**, 854-864  
413 (2017).
- 414 3 Zhang, Y. *et al.* Traditional Chinese medicine combined with pulmonary drug  
415 delivery system and idiopathic pulmonary fibrosis: Rationale and therapeutic  
416 potential. *Biomed Pharmacother* **133**, 111072-111072 (2021).
- 417 4 Liu, C. *et al.* Alkaloids from Traditional Chinese Medicine against  
418 hepatocellular carcinoma. *Biomedicine & Pharmacotherapy* **120**, 109543  
419 (2019).
- 420 5 Zhang, L. *et al.* Pharmacovigilance practice and risk control of Traditional  
421 Chinese Medicine drugs in China: Current status and future perspective.  
422 *Journal of Ethnopharmacology* **140**, 519-525 (2012).
- 423 6 Coghlan, M. L. *et al.* Deep sequencing of plant and animal DNA contained  
424 within traditional Chinese medicines reveals legality issues and health safety  
425 concerns. *PLoS Genet* **8**, e1002657-e1002657 (2012).
- 426 7 Han, J. *et al.* An authenticity survey of herbal medicines from markets in  
427 China using DNA barcoding. *Scientific Reports* **6**, 18723 (2016).
- 428 8 Pang, X. & Chen, S. Identification of Medicinal Plants Using DNA Barcoding  
429 Technique. *Encyclopedia of Analytical Chemistry*, 1-4 (2014).
- 430 9 Commission, C. P. *Chinese Pharmacopoeia*. Vol. 1 (China medical science  
431 and technology press, 2015).
- 432 10 Leong, F. *et al.* Quality standard of traditional Chinese medicines: comparison  
433 between European Pharmacopoeia and Chinese Pharmacopoeia and recent  
434 advances. *Chinese Medicine* **15**, 76 (2020).

- 435 11 Shenhav, L. *et al.* FEAST: fast expectation-maximization for microbial source  
436 tracking. *Nature Methods* **16**, 627-632 (2019).
- 437 12 Cheng, X. *et al.* DNA extraction protocol for biological ingredient analysis of  
438 Liuwei Dihuang Wan. *Genomics Proteomics Bioinformatics* **12**, 137-143  
439 (2014).
- 440 13 Cheng, X. *et al.* Biological ingredient analysis of traditional Chinese medicine  
441 preparation based on high-throughput sequencing: the story for Liuwei  
442 Dihuang Wan. *Scientific reports* **4**, 5147-5147 (2014).
- 443 14 Sun, M. *et al.* Integrated assessment of medicinal rhubarb by combination of  
444 delayed luminescence and HPLC fingerprint with emphasized on bioactivities  
445 based quality control. *Chinese Medicine* **15**, 72 (2020).
- 446 15 Bai, H., Li, X., Li, H., Yang, J. & Ning, K. Biological ingredient complement  
447 chemical ingredient in the assessment of the quality of TCM preparations.  
448 *Scientific Reports* **9**, 5853 (2019).
- 449 16 Wang, J., Guo, Y. & Li, G. L. Current Status of Standardization of Traditional  
450 Chinese Medicine in China. *Evidence-Based Complementary and Alternative  
451 Medicine* **2016**, 9123103 (2016).
- 452 17 Zhang, A., Sun, H., Wang, P., Han, Y. & Wang, X. Future perspectives of  
453 personalized medicine in traditional Chinese medicine: A systems biology  
454 approach. *Complementary Therapies in Medicine* **20**, 93-99 (2012).
- 455 18 Hong, YL. *et al.* Application, problems, and development strategies of  
456 personalized traditional Chinese medicine preparations. *Zhongguo Zhong Yao  
457 Za Zhi* **46**, 3739-3745 (2021).
- 458

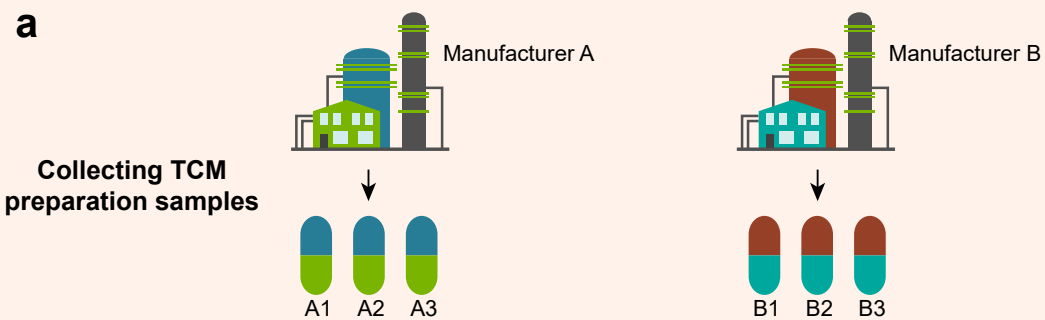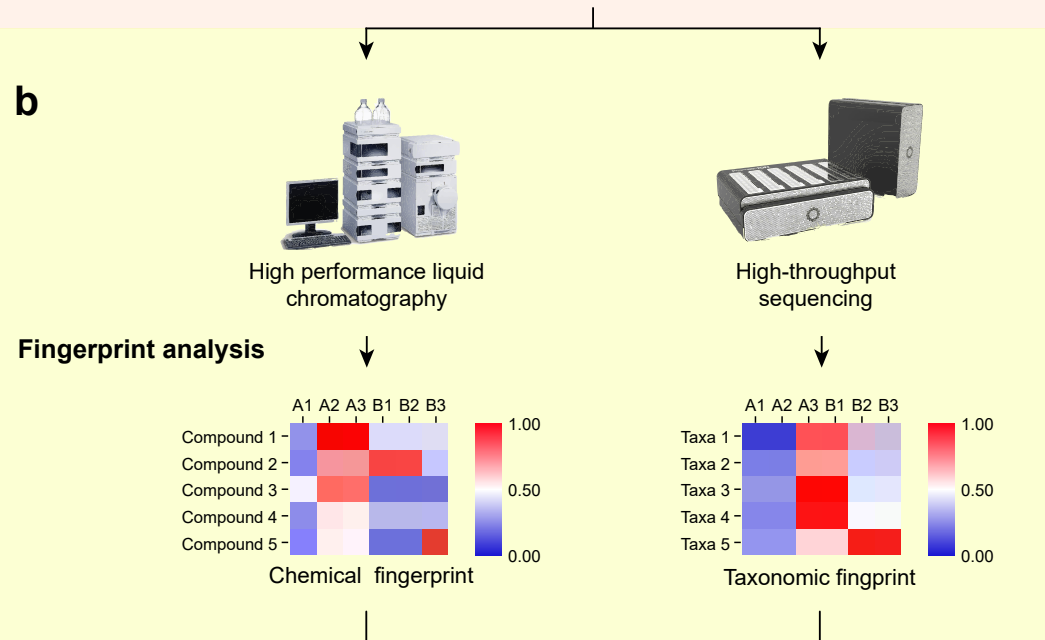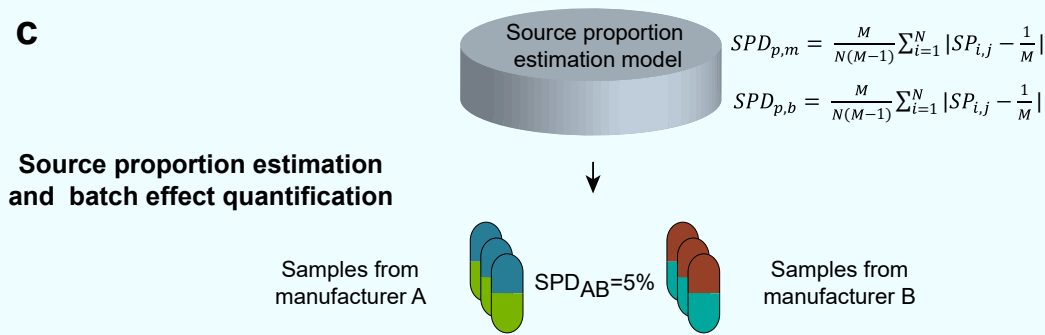

BYW

Chemical

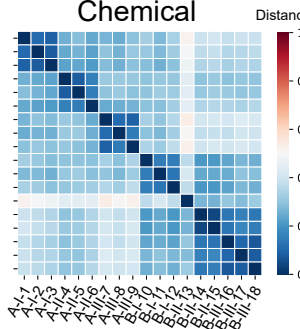

ITS2

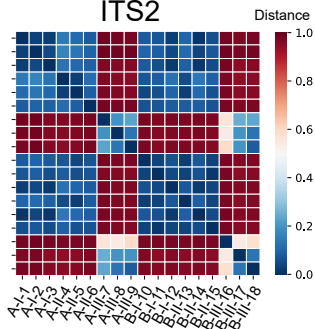

trnL

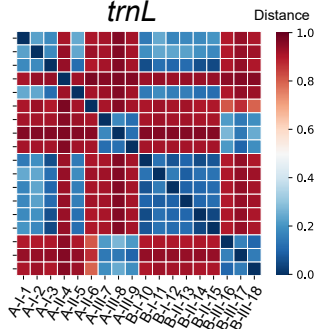

DHW

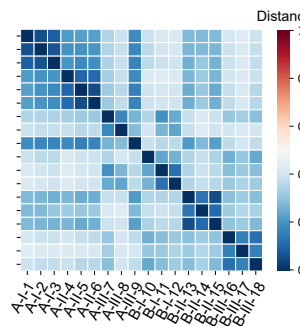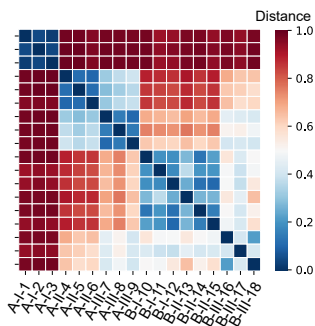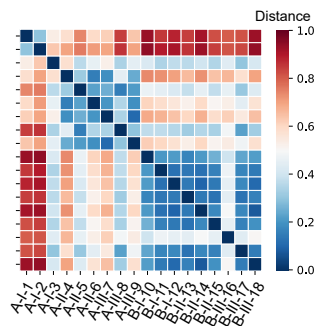

NJW

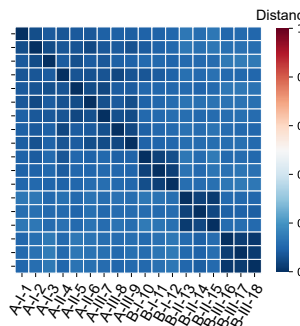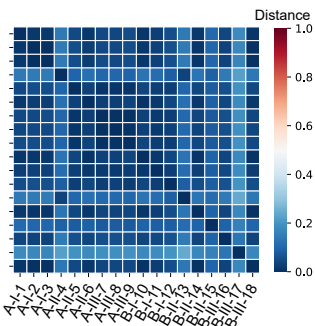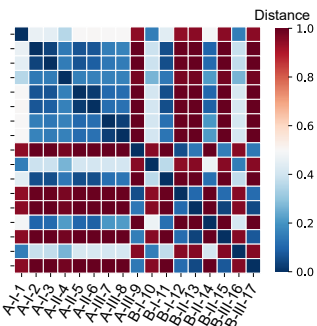

YGW

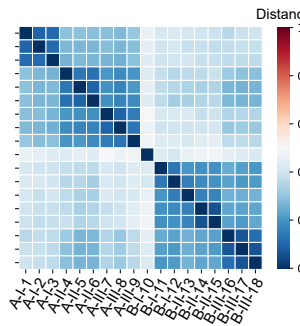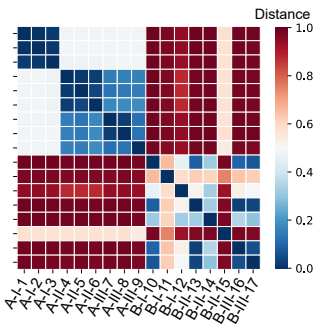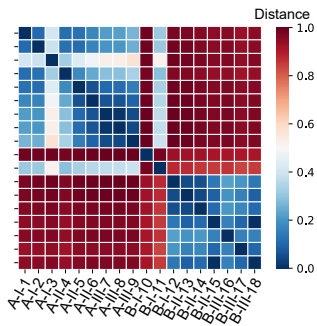

Source: https://www.biorxiv.org/content/10.1101/2022.04.27.489828v1.full.pdf
